# Supplementary material for: Graphene-induced growth of Co3O4 nanoplates with modulable oxygen vacancies for improved OER properties
Source: Royal Society of Chemistry journal article supplement (doi:10.1039/d1ce00255d), 2021-01-01
Supplement: d1ce00255d1.pdf [file d1ce00255d1.pdf]

## Supporting Information

### **Graphene-Induced Growth of Co<sub>3</sub>O<sub>4</sub> Nanoplates with Modulable Oxygen Vacancies for Improved OER Properties**

Lei Qi,<sup>a,b</sup> Mei Wang,<sup>a,b</sup> and Xinheng Li<sup>a,\*</sup>

<sup>a</sup> The State Key Laboratory for Oxo Synthesis and Selective Oxidation, Suzhou Research Institute of LICP, Lanzhou Institute of Chemical Physics (LICP), Chinese Academy of Sciences, Lanzhou, 730000, China.

<sup>b</sup> University of Chinese Academy of Sciences, Beijing 100049, China.

Corresponding Author E-mail: [xinhengli@licp.cas.cn](mailto:xinhengli@licp.cas.cn)

---

## **Experimental Methods**

### **Preparation of pristine $\text{Co}_3\text{O}_4$**

In a typical synthesis process, 2.19 g of  $\text{Co}(\text{NO}_3)_2 \cdot 6\text{H}_2\text{O}$ , 1.40 g of methenamine and 0.10 g of sodium laurylsulfonate were mixed with 200 mL ethylene glycol under vigorous magnetic stirring and reacted in a Teflon-lined stainless-steel autoclave for 24 h at 180 °C. The pink precipitation was obtained after rinsing several times with ethanol and purified water. The final product was collected by annealing at 500 °C for 2 h in air and denoted as pristine  $\text{Co}_3\text{O}_4$ .

### **Synthesis of $\text{Co}(\text{OH})_2$ nanoplates**

g- $\text{Co}_3\text{O}_4$  nanocomposite was synthesized via a facile hydrothermal reaction. 0.1 g of pristine  $\text{Co}_3\text{O}_4$  and 0.15 g of  $\text{NaNO}_3$  were added to 25 mL of home-made graphene oxide solution (1 mg/ml) and sonicated for 10 min. Then, 3 mL of  $\text{NH}_3$  aqueous solution and 0.3 mL of hydrazine hydrate were added. Finally, the solution was transferred into a Teflon-lined stainless-steel autoclave and heated at 180 °C for 3, 6, 9, 12 h respectively, denoted as g- $\text{Co}_3\text{O}_4$  3h, g- $\text{Co}_3\text{O}_4$  6h, g- $\text{Co}_3\text{O}_4$  9h, g- $\text{Co}_3\text{O}_4$  12h. While cooling to room temperature, the solid products were filtered and rinsed several times with ethanol and distilled water and dried for 12 h.

### **Materials Characterization:**

Scanning electron microscopy (SEM) images were taken on a Hitachi S4800 scanning electron microscopy. Nitrogen adsorption-desorption measurements were conducted using a Quantachrome NOVA4200e analyzer. X-Ray diffraction (XRD) measurements were conducted on a SmartLab diffractometer using Cu K $\alpha$  radiation ( $\lambda = 0.15406$  nm) at a scanning rate of 0.02 deg./ sec. X-Ray photoelectron spectroscopy (XPS) analysis was recorded on a thermo scientific NEXSA system, using monochromatic Al K $\alpha$  radiation (1486.6 eV) operating at 25 W.

---

**Electrochemical Measurement:**

The electrochemical tests towards OER performance were conducted on an electrochemical workstation (CHI 760E) with a standard three-electrode cell at room temperature. The as-prepared samples as the working electrode, a Pt wire as the counter electrode, and a standard Ag/AgCl electrode with an additional salt bridge as the reference electrode were used in testing under 1 M KOH. All potentials were calibrated versus RHE, through the equation:  $E(\text{RHE}) = E(\text{Ag/AgCl}) + 0.197 + 0.059 \times \text{pH}$  (the unit is volt). Linear sweeping voltammetry (LSV) was carried out at a scan rate of  $5 \text{ mV s}^{-1}$ , and 95% iR compensation. Tafel slopes were derived from corresponding OER polarization curves and fitted to the Tafel equation  $\eta = b \log j + a$ , where  $\eta$  is overpotential,  $j$  the current density, and  $b$  the Tafel slope. Electrochemical impedance spectroscopy (EIS) was performed over a frequency range from 100 kHz to 0.01 Hz with the potential of 1.6 V vs RHE. Electrochemical surface area (ECSA) was measured by cyclic voltammetry (CV) from 0.2V~0.3V.

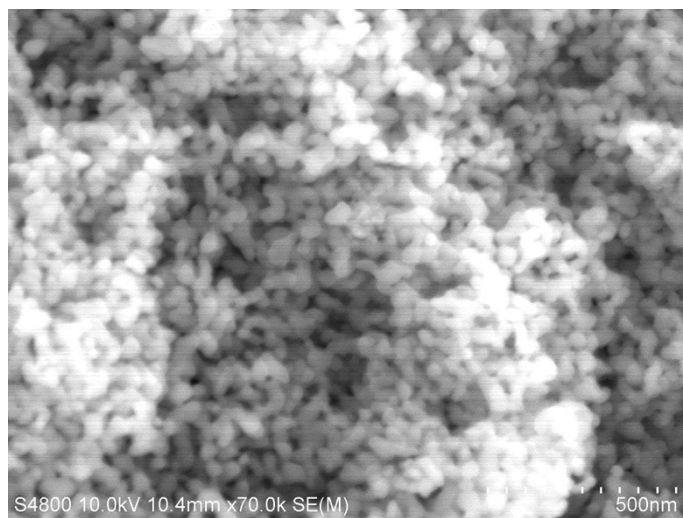

Fig. S1 SEM image of pristine  $\text{Co}_3\text{O}_4$  spheres with good monodispersity. Scale bar is 500 nm.

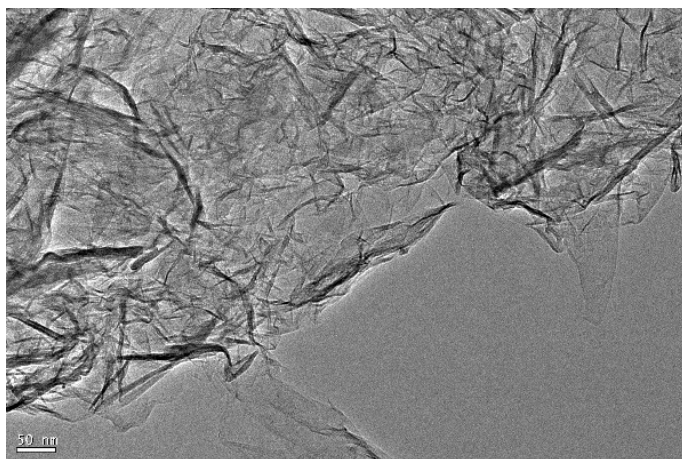

Fig. S2 TEM image of pristine home-made graphene.

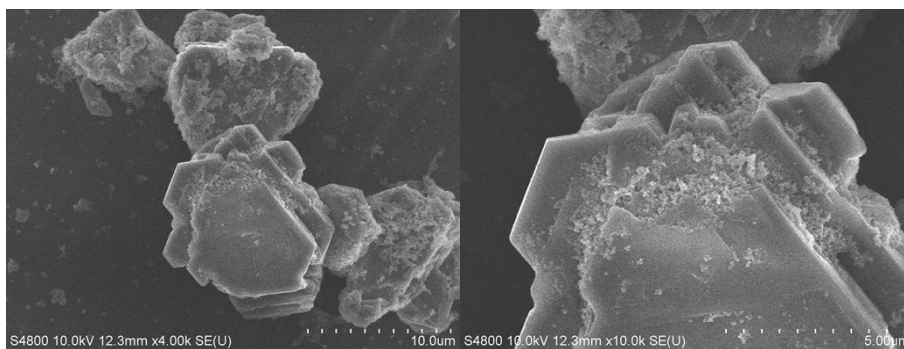

Fig. S3 SEM image of Co<sub>3</sub>O<sub>4</sub> after hydrothermal treatment for 3h.

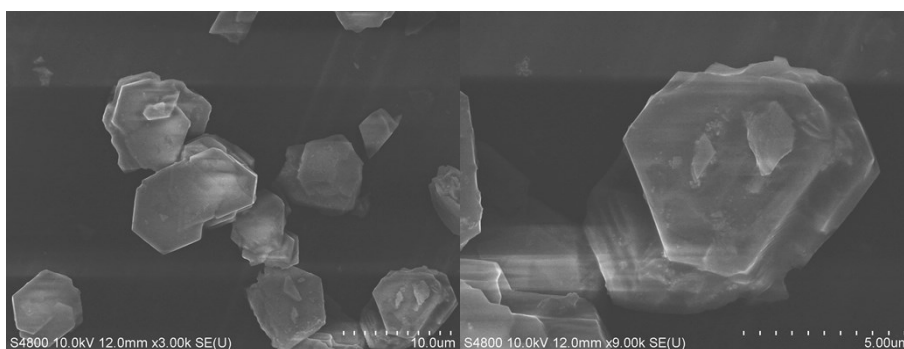

Fig. S4 SEM image of Co<sub>3</sub>O<sub>4</sub> after hydrothermal treatment for 6h.

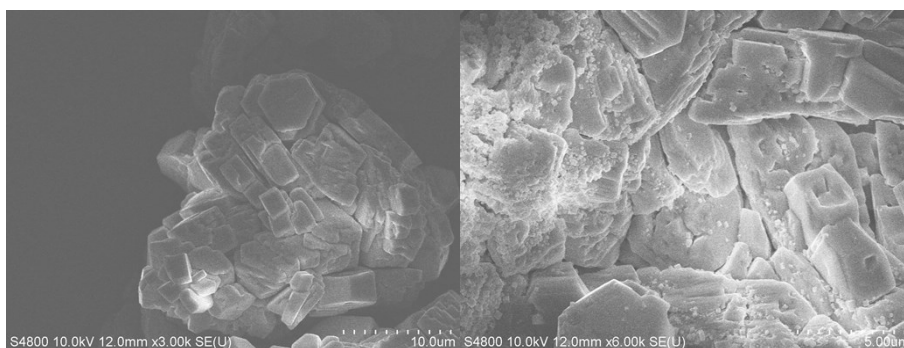

Fig. S5 SEM image of Co<sub>3</sub>O<sub>4</sub> after hydrothermal treatment for 9h.

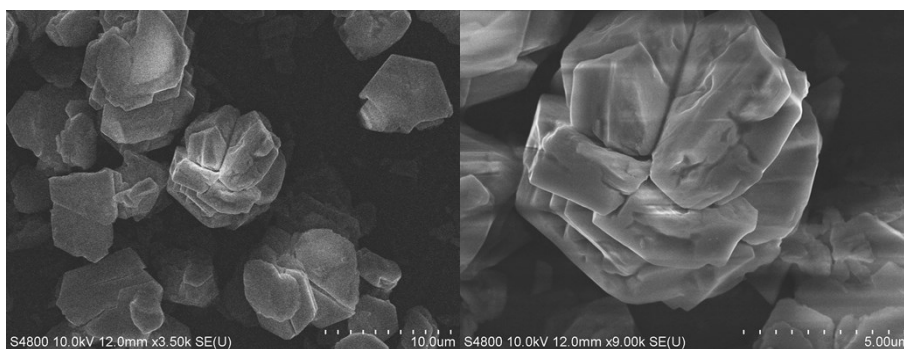

Fig. S6 SEM image of Co<sub>3</sub>O<sub>4</sub> after hydrothermal treatment for 12h.

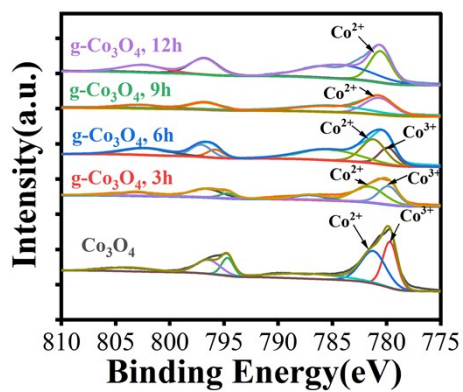

Fig. S7 XPS spectra of Co<sub>2p</sub> over pristine Co<sub>3</sub>O<sub>4</sub> (black line) and g-Co<sub>3</sub>O<sub>4</sub> with different hydrothermal reaction time: (red line) 3 h; (blue) 6 h; (green line) 9 h and (purple line) 12 h.

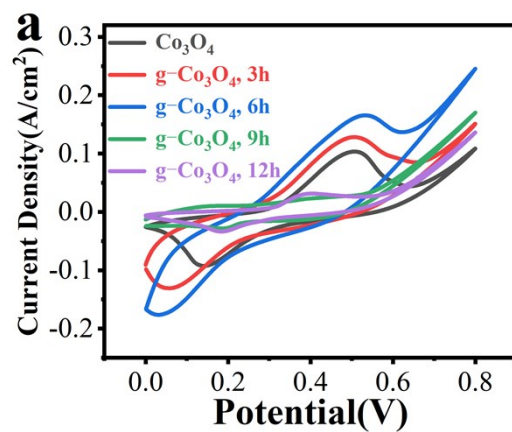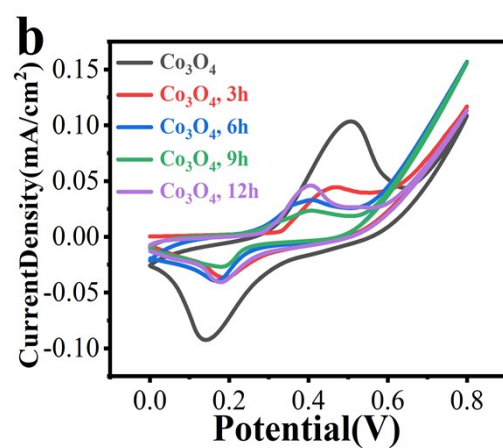

Fig. S8 CV curves of pristine  $\text{Co}_3\text{O}_4$  and  $\text{g-Co}_3\text{O}_4$  after hydrothermal treatment for 3 to 12h

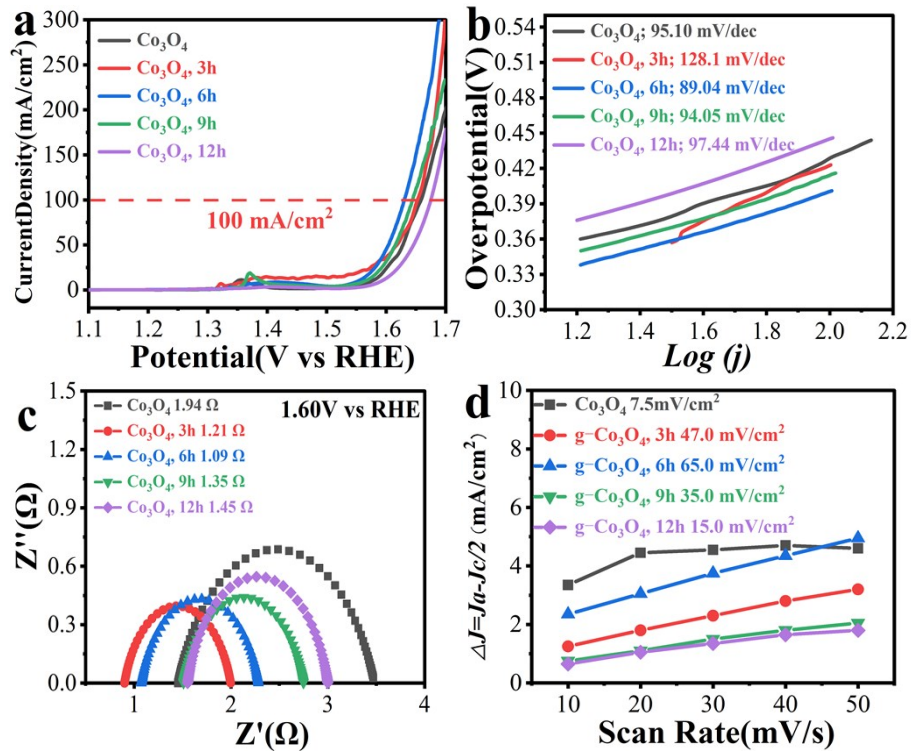

Fig. S9 (a) LSV curves of  $\text{Co}_3\text{O}_4$  (black) and related  $g\text{-Co}_3\text{O}_4$  with different hydrothermal reaction time: (red) 3 h; (blue) 6 h; (green) 9 h and (purple) 12 h; (b) related Tafel slope; (c) Nyquist plots of the samples and (d) Double layer capacitance



---
